# Supplementary material for: Exploring the roles of ZmARM gene family in maize development and abiotic stress response
Source: PeerJ. 2023 Oct 25;11:e16254. doi: 10.7717/peerj.16254 (PMC10619510; doi:10.7717/peerj.16254)
Supplement: Supplemental Information 1 [file peerj-11-16254-s001.xls]

## Sheet: Figure1A
Group1	Group2	Group3	Group4	Group5	Group6	Group7	Group8	Group9
ZmARM1	ZmARM49	ZmARM55	ZmARM38	ZmARM30	ZmARM33	ZmARM36	ZmARM44	ZmARM25
ZmARM2	ZmARM50	ZmARM56	ZmARM39	ZmARM31	ZmARM34	ZmARM37	ZmARM45	ZmARM26
ZmARM3	ZmARM51		ZmARM40	ZmARM32	ZmARM35	ZmARM48	ZmARM46
ZmARM4			ZmARM41		ZmARM47
ZmARM5			ZmARM42
ZmARM6			ZmARM43
ZmARM7
ZmARM8
ZmARM9
ZmARM10
ZmARM11
ZmARM12
ZmARM13
ZmARM14
ZmARM15
ZmARM16
ZmARM17
ZmARM18
ZmARM19
ZmARM20
ZmARM21
ZmARM22
ZmARM23
ZmARM24
ZmARM27
ZmARM28
ZmARM29
ZmARM53
ZmARM54

## Sheet: Figure1B
Group1	Group2	Group3	Group4	Group5	Group6	Group7	Group8	Group9	Group10	Group11
Zm00001eb012430 T001	AT4G12710.1	Zm00001eb001150 T001	AT4G36030.1	Zm00001eb270080 T004	Zm00001eb023660 T001	Zm00001eb279480 T001	Zm00001eb190530 T001	Zm00001eb188680 T001	Zm00001eb141210 T001	AT1G23180.1
Zm00001eb397640 T001	AT5G49305.1	Os03t0116900-01	AT5G66200.1	Zm00001eb377830 T002	Zm00001eb390950 T001	Zm00001eb372570 T001	AT1G20780.1	Os02t0727300-01	Os01t0948500-01	Os01t0524700-01
Os03t0275900-01	AT5G49305.1	Os10t0522601-01	AT4G34940.1	Os06t0137100-01	AT2G44900.1	AT2G22125.1	Os02t0727300-01
Zm00001eb029250 T001	AT5G49310.1	AT1G01830.1	Zm00001eb103700 T001	AT1G12430.2	AT3G60350.1	Zm00001eb091240 T002
Zm00001eb136450 T002	AT3G06720.1	AT2G45720.1	Os09t0536200-00	AT1G01950.3	Os10t0563200-01	AT1G77460.1
Os12t0570000-01	AT4G16143.1	Zm00001eb095530 T002	Zm00001eb224170 T001	Zm00001eb004250 T003	Zm00001eb287530 T001
AT2G28830.1	AT1G02690.2	Os09t0135800-01	Os10t0147900-02	Os03t0152900-01	Zm00001eb349910 T001
AT3G46510.1	AT4G02150.1	AT2G05810.1	Zm00001eb398820 T001	AT3G54870.2	AT5G19330.1
Zm00001eb379620 T001	Zm00001eb127630 T001	AT2G05810.1	Os03t0244700-01	Zm00001eb166150 T003	AT5G13060.1
Os06t0102700-01	Zm00001eb333670 T003		AT3G26600.1	Zm00001eb115370 T001
AT3G54850.1	Os01t0253300-01			AT1G51350.1
Zm00001eb033520 T001	AT1G09270.1
Os08t0481200-01	Zm00001eb282820 T001
Zm00001eb228550 T001	Zm00001eb346120 T002
Os06t0726900-00	Os05t0155601-00
AT1G23030.1	Os01t0343200-01
AT1G71020.1	AT3G05720.1
Zm00001eb190130 T001	Zm00001eb331130 T001
Os02t0732200-01	Os07t0688300-01
AT1G23030.1	Zm00001eb336070 T002
AT1G71020.1	Os01t0158000-01
Zm00001eb241150 T001	AT5G03070.1
Os04t0348400-01
Os02t0488600-01
Zm00001eb326060 T001
Os07t0587500-01
Zm00001eb085470 T001
Zm00001eb420000 T001
Os03t0435300-00
AT3G01400.1
AT5G58680.1
Zm00001eb325810 T001
Os07t0584900-01
Zm00001eb107940 T001
AT4G16490.1
Zm00001eb260470 T006
Zm00001eb174100 T001
Os08t0110500-01
Zm00001eb145570 T001
Os01t0884400-01
AT2G23140.1
AT5G67340.1
AT3G54790.1
Zm00001eb149420 T001
Zm00001eb368740 T001
Os01t0823900-01
Zm00001eb290550 T001
Os05t0476700-01
Os05t0476700-01
Zm00001eb239050 T001
Zm00001eb204890 T001
Os02t0234300-01
AT1G29340.1
Zm00001eb178990 T001
Os08t0415600-00
Zm00001eb311590 T001
Os09t0378700-00
AT1G10560.1
AT1G60190.1
AT1G08315.1
Zm00001eb311800 T001
Zm00001eb099030 T001
Os09t0386200-01
Os08t0421850-00
Os06t0238000-00
AT3G47820.1
AT5G62560.1
AT5G65200.1
AT5G40140.1
Zm00001eb126230 T001
Zm00001eb146820 T001
Zm00001eb334600 T001
Os01t0112500-01
AT3G03440.1
AT4G12710.1
