# Supplementary material for: Exploring the roles of ZmARM gene family in maize development and abiotic stress response
Source: PeerJ. 2023 Oct 25;11:e16254. doi: 10.7717/peerj.16254 (PMC10619510; doi:10.7717/peerj.16254)
Supplement: Supplemental Information 2 [file peerj-11-16254-s002.xls]

## Sheet: Sheet1
		Motif name
MEME-1	PEDFRCPISLELMRDPVIVASGQTYERASI	PS00169 (D_ALA_DEHYDRATASE)
MEME-2	KWLDSGHSTCPKTQQRLANTSLVPNYALRSLIAQWCESNGI	PS00329 (HSP70_2)	PS00355 (HMG14_17)	PS00505 (PEPCK_GTP)	PS00055 (RIBOSOMAL_S12)
MEME-3	LSSSDPELQEHAVTALLNLSIDEANKAAI	PS00604 (SYNAPTOP)	PS00422 (GRANINS_1)	PS00485 (A_DEAMINASE)	PS00039 (DEAD_ATP_HELICASE)	PS00184 (GARS)
MEME-4	LLSSGSPRGKKDAATALYNLC	PS00033 (ENGRAILED)	PS01235 (PDXS_SNZ_1)	PS00757 (PROK_SULFATE_BIND_2)
MEME-5	NRALIVEAGAVPPLV	PS00291 (PRION_1)	PS00656 (GLYCOSYL_HYDROL_F6_2)
MEME-6	GSPEARENAAAALFSLSVVEE	PS01092 (ADENYLATE_CYCLASE_1_1)	PS00893 (NUDIX_BOX)
MEME-7	GAIPPLVELLRSGSPRVREKA	PS00171 (TIM_1)	PS00604 (SYNAPTOP)
MEME-8	LLLRSDEVAAEFRELTAQLATALDLLPYAELGJSDEVREQVDLVSAQLRR	PS00405 (43_KD_POSTSYNAPTIC)
MEME-9	RTVGNIVTGDDMQTQCIIDNQALPCLLNLLTQNHKKSIKKEACWTISNIT	PS00994 (FHIPEP)	PS00961 (RIBOSOMAL_S28E)	PS01232 (PNP_UDP_1)
MEME-10	GGSHDQIKYLVSZGCIKPLCDLLVCPDPRIVTVCLEGLENILKVGEADKT	PS00546 (CYSTEINE_SWITCH)
