# Supplementary material for: Exploring the roles of ZmARM gene family in maize development and abiotic stress response
Source: PeerJ. 2023 Oct 25;11:e16254. doi: 10.7717/peerj.16254 (PMC10619510; doi:10.7717/peerj.16254)
Supplement: Supplemental Information 3 [file peerj-11-16254-s003.xls]

## Sheet: Sheet1
Seq_1	Seq_2	Ka	Ks	Ka_Ks	EffectiveLen	AverageS-sites	AverageN-sites	cN	cS	pN	pS	Note
Zm00001eb178990_T001	Zm00001eb311590_T001	0.247292	0.546123	0.452813	2031	559.417	1471.58	310	217	0.210657	0.387904
Zm00001eb204890_T001	Zm00001eb239050_T001	0.0272871	0.178416	0.152941	2187	563.667	1623.33	43.5	89.5	0.0267967	0.158782
Zm00001eb149420_T001	Zm00001eb290550_T001	0.177284	0.527366	0.336169	1983	538.417	1444.58	228.083	203.917	0.157889	0.378734
Zm00001eb290550_T001	Zm00001eb368740_T001	0.174173	0.488262	0.356719	1983	539.667	1443.33	224.333	193.667	0.155427	0.358863
Zm00001eb149420_T001	Zm00001eb368740_T001	0.0336549	0.152877	0.220144	2076	556.75	1519.25	50	77	0.032911	0.138303
Zm00001eb270080_T004	Zm00001eb377830_T002	0.0231679	0.148947	0.155545	2715	632.917	2082.08	47.5	85.5	0.0228137	0.135089
Zm00001eb174100_T001	Zm00001eb260470_T006	0.0384141	0.186943	0.205485	2484	601.333	1882.67	70.5	99.5	0.0374469	0.165466
Zm00001eb126230_T001	Zm00001eb334600_T001	0.0317407	0.299441	0.106	1092	287.583	804.417	25	71	0.0310784	0.246885
Zm00001eb127630_T001	Zm00001eb333670_T002	0.013357	0.207139	0.0644834	1389	331.5	1057.5	14	60	0.0132388	0.180995
Zm00001eb099030_T001	Zm00001eb311800_T001	0.0565869	0.169589	0.333671	1554	434.833	1119.17	61	66	0.0545048	0.151782
Zm00001eb107940_T001	Zm00001eb325810_T001	0.0411661	0.123152	0.33427	1386	387.417	998.583	40	44	0.0400567	0.113573
Zm00001eb115370_T001	Zm00001eb166150_T003	0.0494635	0.171597	0.288254	1890	469.417	1420.58	68	72	0.0478677	0.153382
