# Supplementary material for: Exploring the roles of ZmARM gene family in maize development and abiotic stress response
Source: PeerJ. 2023 Oct 25;11:e16254. doi: 10.7717/peerj.16254 (PMC10619510; doi:10.7717/peerj.16254)
Supplement: Supplemental Information 4 [file peerj-11-16254-s004.xls]

## Sheet: Abiotic stress
gene_name	Cold_treated_seedlings	Control_seedlings	Heat_treated_seedlings	Salt_treated_seedlings	UV_treated_seedlings
Zm00001eb001150	1.87099	4.24845	1.27604	2.34614	4.9267
Zm00001eb004250	0.435189	0.502277	0.096999	0.172188	1.09337
Zm00001eb012430	11.4859	7.57012	5.94771	6.9858	6.60335
Zm00001eb023660	9.66994	6.01964	6.183	5.06374	9.02609
Zm00001eb029250	2.85898	2.83572	2.91789	4.7484	4.57722
Zm00001eb033520	None	None	None	None	None
Zm00001eb420000	0.00631413	0.0156482	0.0283012	0.354603	None
Zm00001eb085470	None	0.033748	0.00975093	None	None
Zm00001eb091240	2.50931	4.6142	1.19572	1.3175	10.6512
Zm00001eb095530	3.62004	2.778	0.472741	1.6475	3.45932
Zm00001eb099030	5.03138	3.51585	2.58668	1.93595	6.61982
Zm00001eb103700	1.31474	1.37098	0.571665	1.39997	1.19692
Zm00001eb107940	3.93439	2.03041	1.27602	3.08994	1.53106
Zm00001eb115370	11.1498	14.7288	9.54684	16.5363	14.2178
Zm00001eb126230	4.79667	4.28895	2.68432	5.09847	5.25157
Zm00001eb127630	15.2745	16.0797	8.56222	19.3214	17.0114
Zm00001eb136450	4.10073	4.98872	4.12722	6.25071	5.93078
Zm00001eb141210	5.35993	0.335778	0.936459	0.315358	3.67683
Zm00001eb145570	0.51435	0.82998	0.121062	0.353036	1.12108
Zm00001eb146820	0.11486	0.0664181	0.0351547	0.0315853	0.117357
Zm00001eb149420	4.99172	2.73988	0.259868	0.866411	20.8075
Zm00001eb166150	13.4166	15.6921	14.0505	12.6724	13.245
Zm00001eb174100	1.03425	3.08311	1.45026	2.81195	3.8215
Zm00001eb178990	1.06974	0.17881	2.67345	1.37791	0.673811
Zm00001eb188680	0.0684041	0.0978296	0.0648063	0.0751991	0.103403
Zm00001eb190130	0.224011	0.0644338	0.0637507	0.0521907	None
Zm00001eb190530	1.00397	1.97489	1.22725	1.0491	1.65277
Zm00001eb204890	2.39066	2.57713	3.11626	5.5255	3.29342
Zm00001eb224170	2.93332	2.56769	1.28029	1.5706	2.10243
Zm00001eb228550	0.0390465	0.172223	0.0106025	0.0355127	None
Zm00001eb239050	3.15478	3.31307	2.86782	6.06807	4.86075
Zm00001eb241150	16.809	16.9117	17.0527	45.7927	8.88624
Zm00001eb260470	2.62814	2.18315	0.314469	4.30381	2.7867
Zm00001eb270080	6.78529	10.0023	6.02091	5.28408	10.1211
Zm00001eb279480	0.0020603	0.0010488	0.466471	0.197471	0.00348443
Zm00001eb282820	0.848126	0.469423	0.232292	0.663193	0.438299
Zm00001eb287530	3.31482	4.42785	2.25705	4.10499	5.5674
Zm00001eb290550	11.4171	2.447	6.01939	3.67579	8.31131
Zm00001eb311590	None	None	None	None	None
Zm00001eb311800	4.90474	3.67478	1.59586	1.91855	3.36083
Zm00001eb324200	0.383432	0.591537	0.314975	0.000243082	0.00348366
Zm00001eb325810	6.59803	14.3699	5.85248	12.0435	14.2043
Zm00001eb326060	2.72	3.14024	6.66777	21.3488	2.99174
Zm00001eb331130	1.63084	3.10605	1.83144	2.41549	4.0582
Zm00001eb333670	11.5076	13.1904	6.41012	13.9474	16.9937
Zm00001eb334600	3.76235	4.27649	3.18138	6.02422	3.54708
Zm00001eb336070	5.74663	5.21233	3.57442	8.09318	6.5125
Zm00001eb346120	1.5167	2.91008	1.60847	4.19034	2.11913
Zm00001eb349910	2.56229	2.97971	1.59031	1.65372	0.0011813
Zm00001eb368740	3.76989	3.33576	1.10149	1.96118	10.9415
Zm00001eb372570	17.0153	17.7636	4.27184	6.30225	37.8
Zm00001eb377830	4.68015	3.53598	1.17601	2.0775	6.25696
Zm00001eb379620	0.664767	0.165307	0.168975	0.265568	None
Zm00001eb390950	4.09368	3.65998	3.4262	3.15854	12.5936
Zm00001eb397640	None	None	None	None	None
Zm00001eb398820	2.84666	3.11596	1.74706	4.23827	2.44134

## Sheet: Different tissues and developme
gene_name	Anthers_R1	Embryo_24_DAP	Endosperm_24_DAP	V3_Stem_and_SAM	V5_Shoot_tip	V9_Immature_Leaves	VT_Thirteenth_Leaf	Whole_Root_System_7d	Whole_seed_24_DAP
ZmARM1	0.159919	0.510111	0.0624454	0.340577	0.269549	6.01708	1.10637	0.830543	0.112466
ZmARM2	0.634161	2.02396	1.50208	2.49451	1.90741	0.356791	0.0388581	1.51978	1.38474
ZmARM3	6.93257	14.6113	7.83113	6.07533	9.41355	13.8887	17.8339	6.78755	10.7499
ZmARM4	13.0361	6.6049	6.0851	6.93382	8.46327	9.46463	5.31669	5.93593	7.16274
ZmARM5	5.70865	7.43635	4.58219	6.90875	8.82594	6.81913	9.24649	8.68968	6.45208
ZmARM6	15.292	0.0207238	0.0275667	0.0279457	0	0.0340227	0.025632	0.0766441	0.017491
ZmARM7	0	0	0	0	0	0.141613	0.336825	0	0
ZmARM8	0.0461377	0.219382	0.172225	0	0.318484	0.224663	0.152136	0	0.182376
ZmARM9	1.7863	5.56532	2.06327	7.60791	10.3526	6.59397	1.4293	3.69239	3.20512
ZmARM10	1.82045	4.02776	1.60249	7.96503	9.57898	9.1098	1.14903	2.81281	2.35388
ZmARM11	0.0254171	0.266435	0.042081	0.677048	0.233667	16.2818	0.331573	0.329024	0.147881
ZmARM12	29.8612	1.7648	0.0897393	1.52921	2.14029	3.07802	0.691168	1.80466	0.849637
ZmARM13	0.322804	1.38578	0.067644	0.336702	1.02138	0.722308	3.5497	0.160794	0.332675
ZmARM14	12.3445	14.6674	5.83613	13.6393	16.9793	10.2948	13.5833	18.2225	7.96764
ZmARM15	5.11086	0.405619	0.184481	2.54483	2.65951	2.29109	14.3977	6.48406	0.436312
ZmARM16	15.0489	42.7067	38.5176	51.6242	58.0576	26.0142	15.1665	26.2664	41.0289
ZmARM17	4.57938	3.90929	1.91246	6.26236	2.4453	9.22934	15.7379	7.882	1.22628
ZmARM18	0.294641	0.0543397	2.45687	0.218443	0.0839146	1.29825	0.25918	0.263912	1.23078
ZmARM19	0.786067	1.39267	2.38216	1.51179	1.43341	1.46651	0.626942	2.47057	2.22645
ZmARM20	0.0076269	0	0.0357386	0.0197731	0.009896	0.0120728	0.0411613	0.0062497	0.0150118
ZmARM21	0.423656	0.291795	0.0211401	1.02071	0.35793	8.15933	0.752195	5.00529	0.103883
ZmARM22	9.36943	13.0567	8.10926	12.4717	13.5952	8.32602	10.8288	22.1076	10.0519
ZmARM23	4.84353	3.92203	2.11662	4.03903	5.76421	4.98177	2.54411	4.85318	2.70172
ZmARM24	1.46587	0.297898	0.0241686	0.016187	0.0161046	0.256677	0.0408937	0.268874	0.031349
ZmARM25	0.0665437	0.166627	0.0400749	0.17984	0.156711	0.111459	0.062431	0.0441603	0.0755697
ZmARM26	0.161433	0.0391955	0.0707209	0.139719	0.130299	0.184064	0.0424707	0.2313	0.0404586
ZmARM27	0.487616	0.125902	0.0186291	1.55268	0.141772	1.21662	1.59158	6.2117	0.149008
ZmARM28	5.51978	0.753771	0.773609	1.35049	1.06368	2.94352	7.11519	3.10701	0.965632
ZmARM29	0.319187	0.369994	0.462104	1.24375	0.838043	1.74752	0.729387	1.13666	0.358764
ZmARM30	39.0463	0.463257	0.243856	0.689145	0.738085	0.288858	0.0594607	0.282825	0.210851
ZmARM31	8.51773	1.08712	0.739839	2.06534	1.82757	4.78812	13.1409	3.34714	1.11576
ZmARM32	3.36806	6.83528	3.32754	10.3088	8.02222	19.6575	18.8166	22.8909	5.63104
ZmARM33	1.69554	0.728314	1.47828	2.03517	4.10003	4.91253	3.89255	2.22046	1.67171
ZmARM34	2.87666	9.95249	7.95211	12.3477	16.9828	9.36581	3.61589	4.91595	9.2813
ZmARM35	1.14346	4.77344	3.29467	3.16924	5.81296	16.7161	1.67186	0.000155801	3.44715
ZmARM36	0.472436	0.60412	0.36224	1.26248	0.716886	0.325166	0.457943	0.861879	0.433702
ZmARM37	6.53822	5.95061	4.76888	6.49435	8.93273	7.76277	3.77666	5.69215	5.35761
ZmARM38	2.18602	0.940532	0.622732	1.07352	0.664814	22.0146	3.69832	3.51285	0.845775
ZmARM39	0	0	0	0	0	0	0	0	0
ZmARM40	0.321043	0.236681	0.13579	0.980334	0.64748	5.1771	1.78045	0.772126	0.186287
ZmARM41	0.935715	4.81614	0.132611	0.665134	0.239216	1.25995	0.487546	0.288598	0.74271
ZmARM42	2.06289	1.31981	6.34236	3.35627	3.25151	16.8023	13.3179	2.59667	5.82546
ZmARM43	1.7931	0.563392	0.841065	0.839905	1.46462	4.10935	8.17612	2.25612	0.858664
ZmARM44	1.06053	3.02362	1.74518	4.47518	4.59017	4.71542	0.997979	4.1536	2.08402
ZmARM45	16.7385	37.2625	16.2431	41.2185	50.3234	19.7733	13.3062	20.98	21.4661
ZmARM46	12.0433	0.796601	0.844279	1.3086	0.661201	1.63964	9.7554	3.53825	1.39171
ZmARM47	2.89588	5.25153	5.46662	4.63007	3.89053	2.42736	3.59903	7.64773	6.34854
ZmARM48	4.03013	17.9802	14.731	0.0387989	20.4636	20.5842	10.237	6.00361	13.4315
ZmARM49	4.62402	5.13386	7.61132	4.26682	8.40236	5.26008	1.69994	5.97132	6.9236
ZmARM50	0.321518	0.052473	0.0103804	0.460541	0.0986703	7.9148	0.545556	4.23103	0.133549
ZmARM51	6.99245	13.5769	10.0524	13.8085	18.2666	29.0304	0.990611	21.488	10.6388
ZmARM52	3.3064	8.84465	5.35546	11.448	12.7943	3.95314	2.13834	4.70768	6.39014
ZmARM53	0	0.110071	0	0.164621	0	0.639758	0.536667	0.254371	0
ZmARM54	7.84983	7.41042	3.57679	7.13331	8.74892	6.07697	2.09012	3.72431	4.7094
ZmARM55	0.0907987	0	0	0	0	0	0	0	0
ZmARM56	2.1753	0.105049	0.274471	1.702	0.532621	5.52655	7.37868	2.05282	0.250406

## Sheet: RNA-seq
We've published this data, DOI: 10.1111/tpj.14267.
	WWA	WWB	DT2A	DT2B	DT3A	DT3B	DT4A	DT4B
Zm00001eb012430	29.17	32.29	30.84	26.17	23.49	24.53	14.78	11.46
Zm00001eb397640	0	0	0	0	0	0	0	0
Zm00001eb029250	18.95	13.7	17.26	16.24	11.32	14.74	15.17	9.81
Zm00001eb136450	23.5	20.31	25.66	23.34	38.11	29.53	45.22	43.87
Zm00001eb379620	8.9	48.52	0	0	0	0	0	0
Zm00001eb190130	1.59	1.93	1.43	1.39	1.84	1.73	0.55	0.31
Zm00001eb241150	78.38	82.88	67.5	69.47	59.86	69.01	40.76	48.23
Zm00001eb033520	0	0	0	0	0	0	0	0
Zm00001eb228550	0.44	0.34	0.51	0.19	0	0	0	0
Zm00001eb178990	0.1	0.86	1.46	0.75	0.23	0.7	0.37	0.46
Zm00001eb311590	7.21	2.66	5.79	3.27	3.58	4.29	10.17	15.2
Zm00001eb239050	13.97	14.11	45.6	43.35	41.3	39.37	38.48	38.31
Zm00001eb204890	9.23	9.09	10.86	5.57	6.69	1.99	3.76	3.15
Zm00001eb290550	1.12	0.86	1.46	0.75	0.23	0.7	0.37	0.46
Zm00001eb149420	2.7	3.77	4.86	2.75	8.79	7.55	31.25	40.42
Zm00001eb368740	2.68	3.17	5.22	4.28	6.08	5.15	6.51	8.11
Zm00001eb326060	8.36	8.13	8.59	8.71	10.7	8.65	10.16	12.01
Zm00001eb420000	0	0	0	0	0	0	0	0
Zm00001eb085470	0	0	0	0	0	0	0	0
Zm00001eb107940	2.26	4.24	5.85	5.64	6.75	6.71	1.26	0.73
Zm00001eb325810	21.62	22.25	19.66	13.32	12.57	16.48	15.61	16.47
Zm00001eb145570	0.78	0.58	0.77	0.76	1.12	0.84	0.9	1.36
Zm00001eb260470	7.6	8.79	7.9	7.95	20.83	16.37	32.14	27.26
Zm00001eb174100	7.38	8.69	14.55	13.43	17.79	14.84	16.36	11.75
Zm00001eb287530	10.44	10	10.29	10.98	14.87	13.16	17.6	14.52
Zm00001eb349910	19.23	14.92	14.27	14.56	13.21	11.45	18.08	19.02
Zm00001eb146820	1.27	0.78	2.03	3.82	8.86	4.07	20.5	24.3
Zm00001eb126230	8.55	0.64	0.69	2.12	1.79	3.96	0	0
Zm00001eb334600	20.29	22.78	16.84	17.06	12	14.48	6.56	3.9
Zm00001eb001150	0	0	0	0	0	0	0	0
Zm00001eb095530	1.57	1.82	2.06	1.8	2.23	2.59	3.48	2.75
Zm00001eb324200	0.84	0.43	1.26	1.3	1.83	1.69	4.42	5.75
Zm00001eb279480	14.65	13.53	15.12	15.52	20.24	17.98	24.77	27
Zm00001eb372570	15.29	13.33	23.89	18.5	32.29	24.58	34.69	29.43
Zm00001eb091240	4.1	4.85	12.29	8.57	8.7	5.49	8.34	8.48
Zm00001eb166150	24.39	32.04	37.45	34.34	39.88	36.9	3.09	0.93
Zm00001eb115370	18.55	19.87	16.86	11.85	10.78	12.26	13.34	13.39
Zm00001eb336070	29.54	34.98	22.86	22.85	42.22	23.39	26.26	25.1
Zm00001eb331130	4.08	4.37	3.6	1.11	4.57	1.44	0.75	0.25
Zm00001eb127630	41.62	36.87	39.36	39.68	29.59	22.09	31.67	33.22
Zm00001eb333670	41.17	36.69	35.68	32.45	23.09	24.02	17.73	17.05
Zm00001eb282820	70.65	58.12	66.36	66.82	162.63	98.44	462.39	478.11
Zm00001eb346120	99.9	84.19	93.02	93.25	107.49	88.76	97.1	86.41
Zm00001eb224170	3.29	2.36	2.33	3.03	2.68	1.56	0.67	1.52
Zm00001eb398820	12.3	11.35	11.6	10.01	14.88	11.21	5.7	6.09
Zm00001eb103700	1.55	1.62	1.26	1.3	1.83	1.69	4.42	5.75
Zm00001eb190530	5.27	2.93	2.48	2.44	0.98	1.27	0.56	0.84
Zm00001eb141210	9.76	10.47	12.74	10.01	14.88	11.21	5.7	6.09
Zm00001eb270080	7.39	8.24	6.4	6.4	2.61	3.29	2.03	2.05
Zm00001eb377830	6.29	7.55	6.94	6.62	15.29	12.11	16.56	12.15
Zm00001eb004250	0.49	0.69	0.62	0.75	0.23	0.7	0.37	0.46
Zm00001eb188680	4.74	6.14	5.69	0	0	0	0	0
Zm00001eb311800	0.89	1.72	3.54	5.22	7.49	5.3	5.45	6.79
Zm00001eb099030	0.04	0	0	0	0	0	0	0
Zm00001eb023660	11.87	11.11	12.64	13.33	23.81	19.26	15.04	7.67
Zm00001eb390950	7.79	6.45	6.49	7.33	12.56	10.96	20.76	26.66
