# Supplementary material for: Exploring the roles of ZmARM gene family in maize development and abiotic stress response
Source: PeerJ. 2023 Oct 25;11:e16254. doi: 10.7717/peerj.16254 (PMC10619510; doi:10.7717/peerj.16254)
Supplement: Supplemental Information 5 [file peerj-11-16254-s005.xls]

## Sheet: Sheet1
Table S1 Primers used for qRT-PCR
Gene name	Forward primer	Reverse primer
ZmARM4	TCGAGCGGATGAGCAGGTTC	TGTTGAAGGACATCAGCCTCC
ZmARM12	GAGAAGCCAAATGCCATCGG	GGTTTGACAACTCCCCGCT
ZmARM34	TGAGGCAACTCAAGAGGCAG	CGATGCAGCGACTGATTGTG
ZmARM36	GCAGATCGCATCAAACCGTC	AGTCTGACGGCTCTACCAGA
Actin
