# Supplementary material for: Exploring the roles of ZmARM gene family in maize development and abiotic stress response
Source: PeerJ. 2023 Oct 25;11:e16254. doi: 10.7717/peerj.16254 (PMC10619510; doi:10.7717/peerj.16254)
Supplement: Supplemental Information 6 [file peerj-11-16254-s006.xls]

## Sheet: leaf,ovaries vs our data
Gene name	Gene ID	Basal_leaf_meristem_control	Basal_leaf_meristem_drought		Maize_ovaries_1_DAP_control	Maize_ovaries_1_DAP_drought		WW	DT4
ZmARM6	Zm00001eb190130	0.0116882	0.277575	4.56975	0.143037	0.0860833	-0.732583	-0.32325	-0.527916	0.70766
ZmARM15	Zm00001eb149420	2.44002	4.67317	0.937507	3.42143	6.95495	1.02344	3.235	35.835	3.46953
ZmARM22	Zm00001eb145570	0.805237	2.78257	1.78893	3.54826	6.54737	0.883802	0.68	1.13	0.732716
ZmARM32	Zm00001eb324200	0.414074	2.26166	2.44942	2.50074	0.353209	-2.82376	0.635	5.085	3.00142
ZmARM33	Zm00001eb279480	0.00928282	0.000166541	-5.80061	1.84309	3.10037	0.75031	14.09	25.885	0.877445
ZmARM42	Zm00001eb282820	0.525648	0.242625	-1.11537	0.312612	0.486583	0.638313	64.385	470.25	2.86863
ZmARM45	Zm00001eb398820	2.34951	7.08268	1.59193	2.89735	5.26543	0.86182	11.825	5.895	-1.00428
ZmARM48	Zm00001eb141210	1.71535	17.2948	3.33376	3.53265	40.187	3.50791	10.115	5.895	-0.778933

## Sheet: leaf vs our data
Gene name	Gene ID
ZmARM6	Zm00001eb190130
ZmARM14	Zm00001eb290550
ZmARM15	Zm00001eb149420
ZmARM16	Zm00001eb368740
ZmARM22	Zm00001eb145570
ZmARM29	Zm00001eb334600
ZmARM32	Zm00001eb324200
ZmARM33	Zm00001eb279480
ZmARM42	Zm00001eb282820
ZmARM45	Zm00001eb398820
ZmARM48	Zm00001eb141210

## Sheet: ovaries vs our data
Gene name	Gene ID
ZmARM6	Zm00001eb190130
ZmARM12	Zm00001eb239050
ZmARM15	Zm00001eb149420
ZmARM22	Zm00001eb145570
ZmARM31	Zm00001eb095530
ZmARM32	Zm00001eb324200
ZmARM33	Zm00001eb279480
ZmARM34	Zm00001eb372570
ZmARM39	Zm00001eb331130
ZmARM42	Zm00001eb282820
ZmARM45	Zm00001eb398820
ZmARM46	Zm00001eb103700
ZmARM48	Zm00001eb141210
ZmARM49	Zm00001eb270080
ZmARM50	Zm00001eb377830
ZmARM56	Zm00001eb390950
